# Supplementary material for: Quantifying the current and future likelihood of the 2022 extreme wildfires weather conditions in France with anthropogenic climate change
Source: Copernicus journal article supplement (doi:10.5194/egusphere-2026-136), 2026-01-22
Supplement: Supplementary file 1 [file egusphere-2026-136-supplement.pdf]

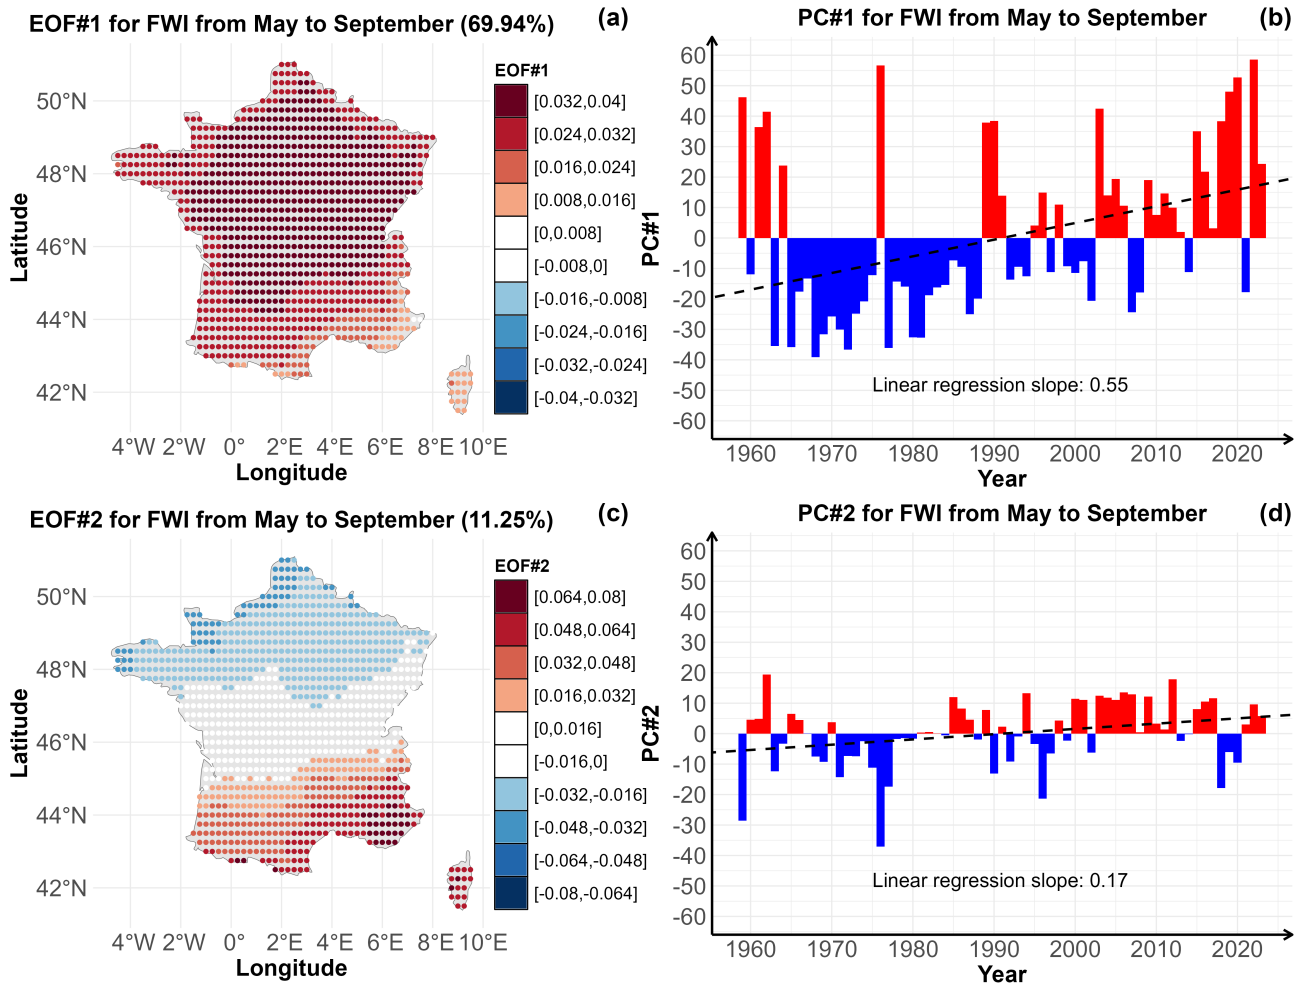

**Figure S1.** Same as Fig. 3 except that the Fire Weather Index (FWI) was derived from the ERA5 dataset.

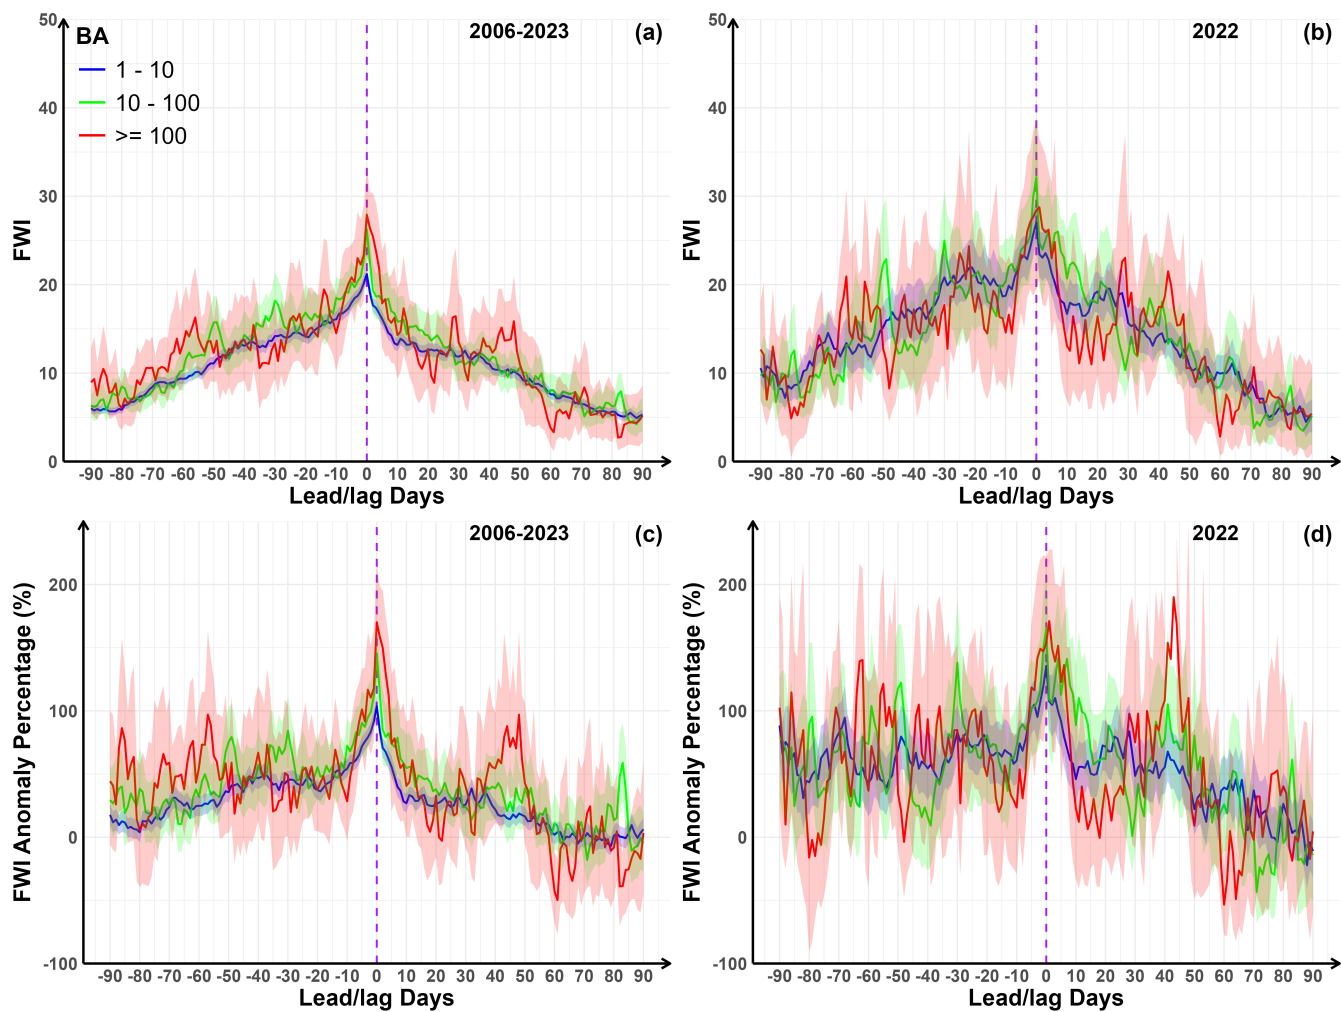

**Figure S2.** Same as Fig. 4 except that the Fire Weather Index (FWI) was derived from the ERA5 dataset.

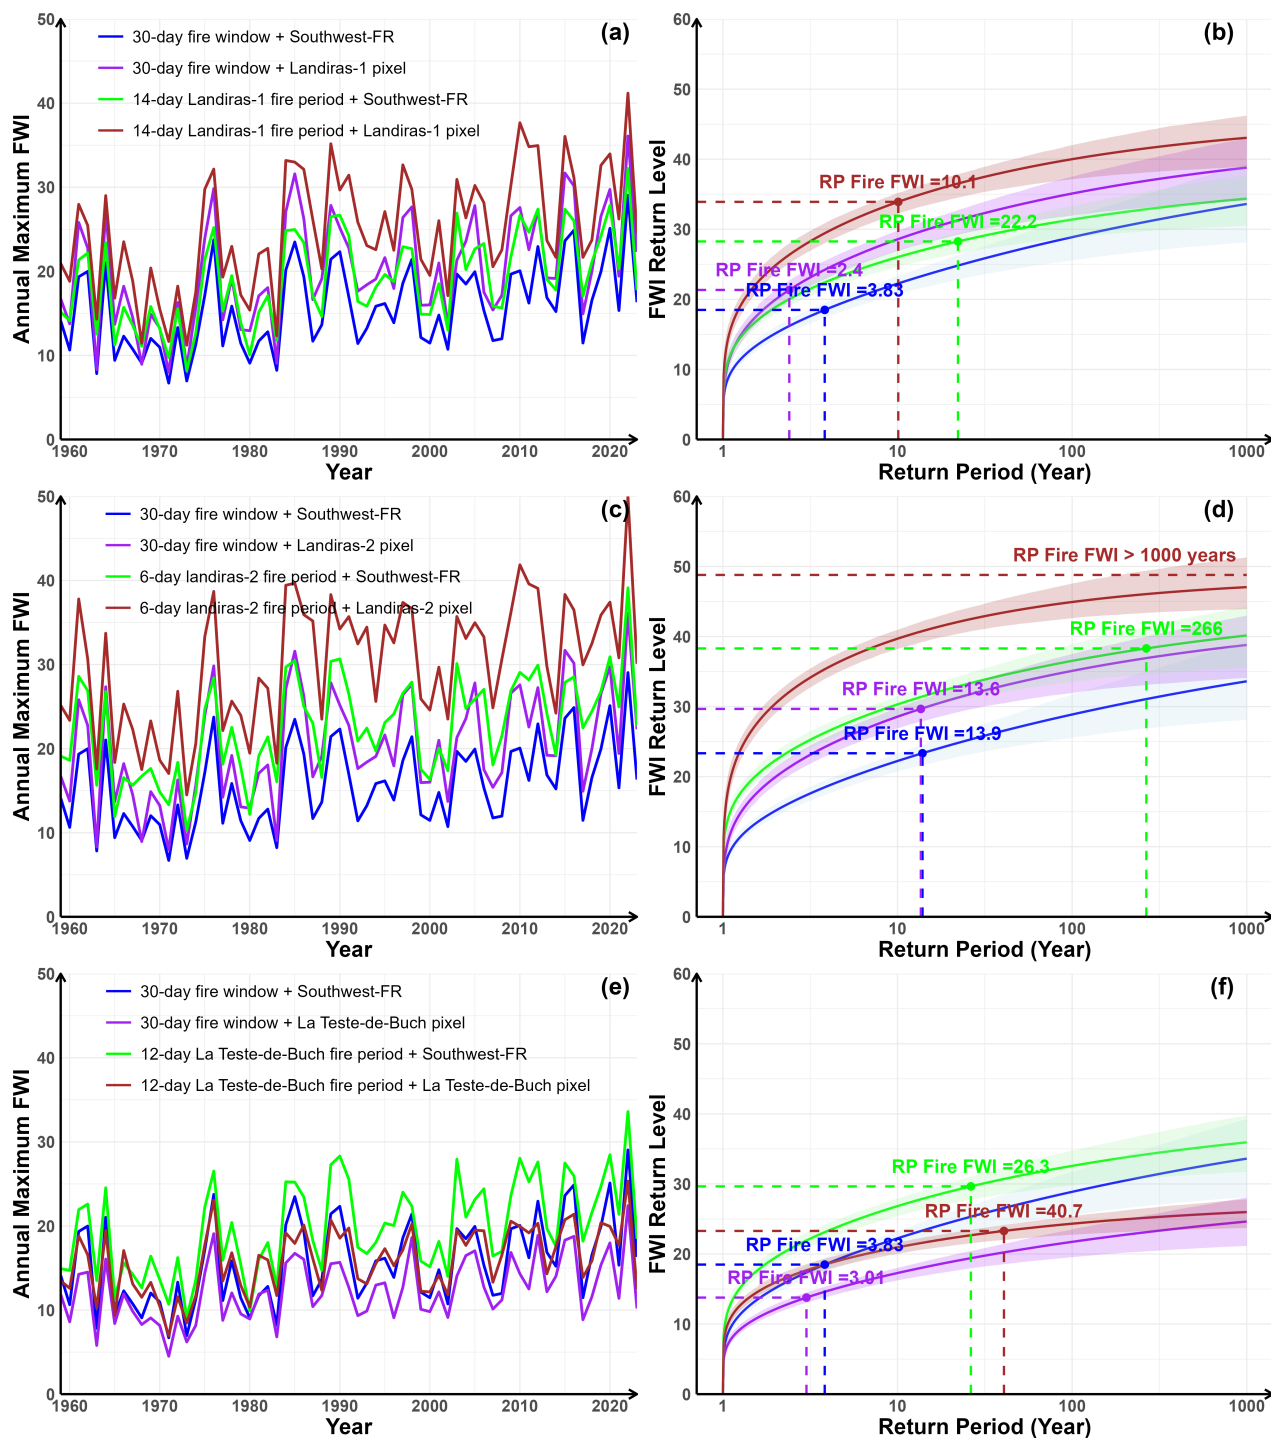

**Figure S3.** Same as Fig. 5 except that the Fire Weather Index (FWI) was derived from the ERA5 dataset.

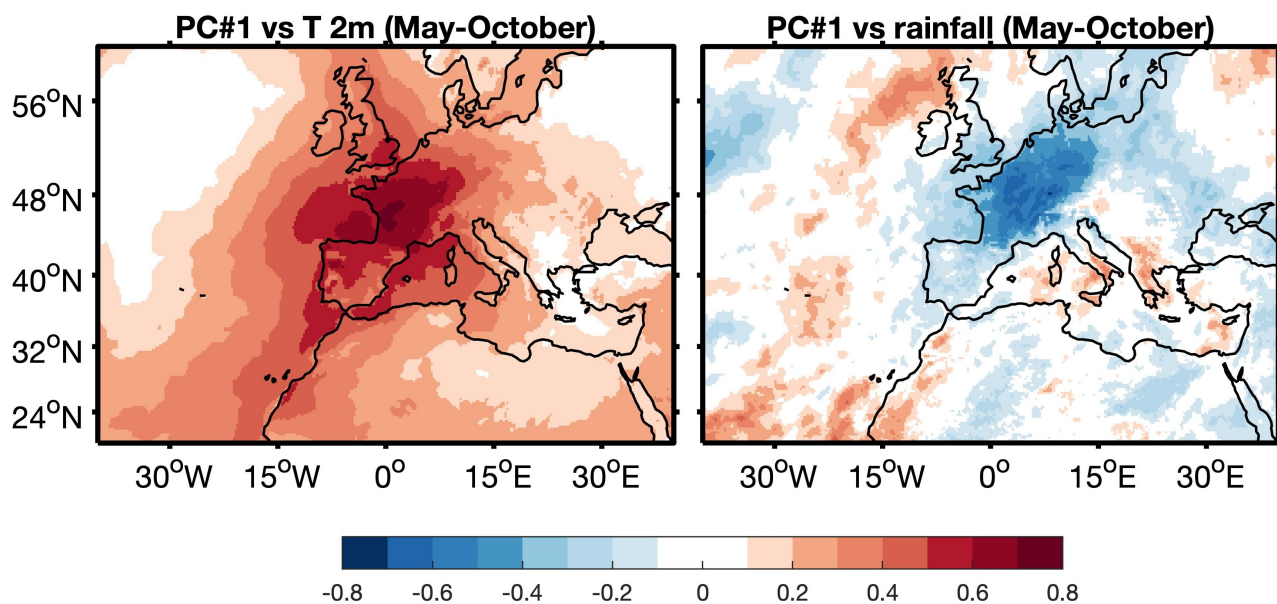

**Figure S4.** Correlations between the first principal component (PC1) of the May-October Fire Weather Index (FWI) over France and large-scale temperature (left) and rainfall (right).

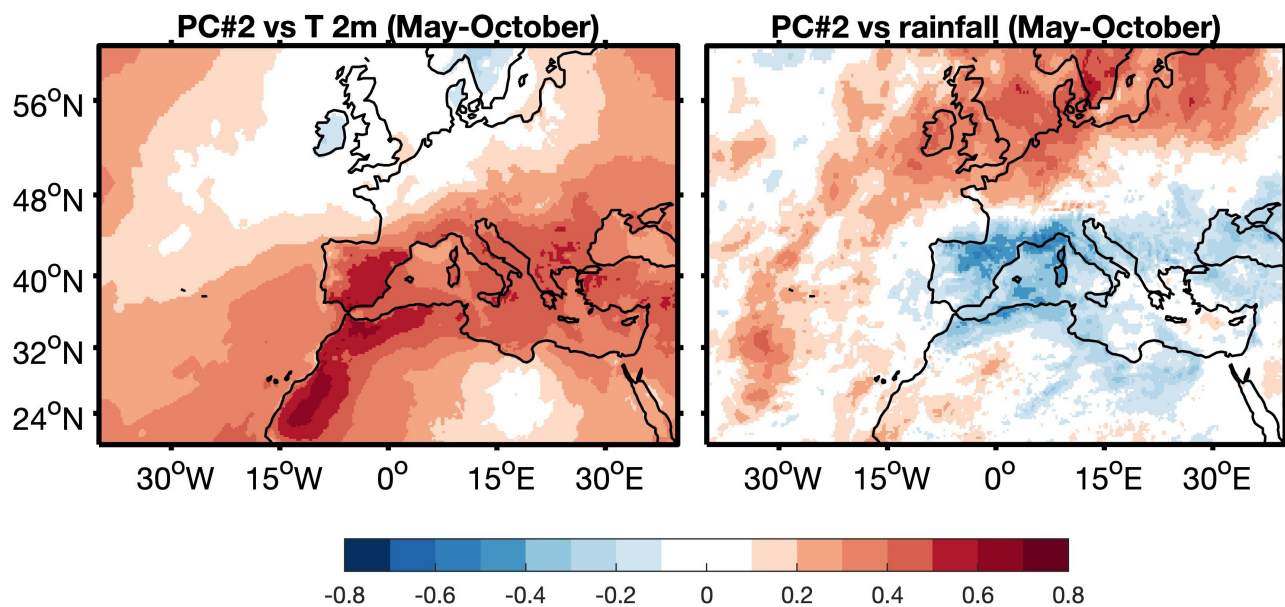

**Figure S5.** Same as Fig. S4 but for the second principal component (PC2).
